CORRECTION

## Correction: A disordered encounter complex is central to the yeast Abp1p SH3 domain binding pathway

Gabriella J. Gerlach, Rachel Carrock, Robyn Stix, Elliott J. Stollar, K. Aurelia Ball

[S1 Fig](#) is incorrect. Please see the correct [S1 Fig](#) below.

### Supporting information

**S1 Fig. Pairwise distances used in the determination of whether the encounter simulation has reached the bound state.** The distances K(3)-Y10, P(2)-V55, P(0)-Y54, and K(-3)-K38 were used in the seg1 simulations and all seven distances were used in the ArkA simulations. The pairwise distance in the NMR ranges from 8.73 to 8.99 Å.

(PNG)

### Reference

1. Gerlach GJ, Carrock R, Stix R, Stollar EJ, Ball KA. A disordered encounter complex is central to the yeast Abp1p SH3 domain binding pathway. PLoS Comput Biol. 2020;16(9):e1007815. <https://doi.org/10.1371/journal.pcbi.1007815> PMID: [32925900](https://pubmed.ncbi.nlm.nih.gov/32925900/)

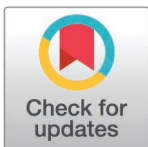

### OPEN ACCESS

**Citation:** Gerlach GJ, Carrock R, Stix R, Stollar EJ, Ball KA (2025) Correction: A disordered encounter complex is central to the yeast Abp1p SH3 domain binding pathway. PLoS Comput Biol 21(6): e1013201. <https://doi.org/10.1371/journal.pcbi.1013201>

**Published:** June 18, 2025

**Copyright:** © 2025 Gerlach et al. This is an open access article distributed under the terms of the [Creative Commons Attribution License](https://creativecommons.org/licenses/by/4.0/), which permits unrestricted use, distribution, and reproduction in any medium, provided the original author and source are credited.
